# Supplementary material
Source: PubMed Central journal article supplement (PMC4401084)
Supplement: NIHMS640666-supplement-Supplemenatal.pdf [file NIHMS640666-supplement-Supplemenatal.pdf]

## Supplementary information

### The sirtuin SIRT6 blocks IGF-Akt signaling and development of cardiac hypertrophy by targeting c-Jun.

Nagalingam R. Sundaresan<sup>1</sup>, Prabhakaran Vasudevan<sup>2</sup>, Lei Zhong<sup>3</sup>, Gene Kim<sup>4</sup>, Sadhana Samant<sup>1</sup>, Vishwas Parekh<sup>2</sup>, Vinodkumar B. Pillai<sup>1</sup>, PV Ravindra<sup>1</sup>, Madhu Gupta<sup>5</sup>, Valluvan Jeevananadam<sup>1</sup>, John M. Cunningham<sup>2</sup>, Chu-Xia Deng<sup>6</sup>, David B. Lombard<sup>7</sup>, Raul Mostoslavsky<sup>3</sup> and Mahesh P. Gupta<sup>1,\*</sup>

<sup>1</sup>Department of Surgery, Committee on Cellular and Molecular Physiology, University of Chicago, Chicago, IL.

<sup>2</sup>Department of Pediatrics, Committee on Developmental Biology, University of Chicago, Chicago, IL.

<sup>3</sup>The Massachusetts General Hospital Cancer Center, Harvard Medical School, Boston MA,

<sup>4</sup>Department of Medicine, Section of Cardiology, University of Chicago, Chicago, IL.

<sup>5</sup>Department of Physiology and Biophysics, University of Illinois at Chicago, Chicago, IL.

<sup>6</sup>National Institute of Diabetes, Digestive and Kidney Diseases, US, National Institutes of Health, Bethesda, MD.

<sup>7</sup>Department of Pathology and Institute of Gerontology, University of Michigan, Ann Arbor, MI.

\*Address of corresponding author: Department of Surgery, MC 5040, University of Chicago, 5841 S. Maryland Avenue, Chicago, IL 60637: [mgupta@surgery.bsdc.uchicago.edu](mailto:mgupta@surgery.bsdc.uchicago.edu)

## Supplementary Figure 1

**a : human hearts**

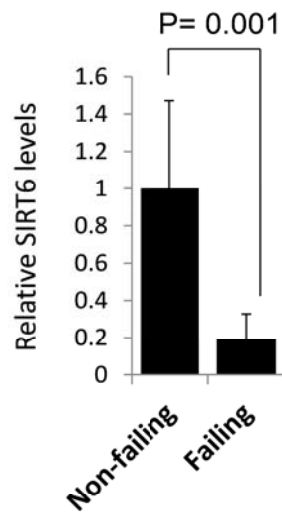

**b : mouse hearts**

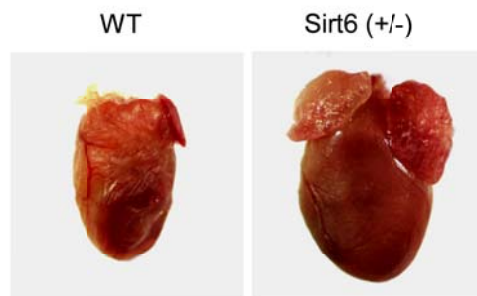

**d**

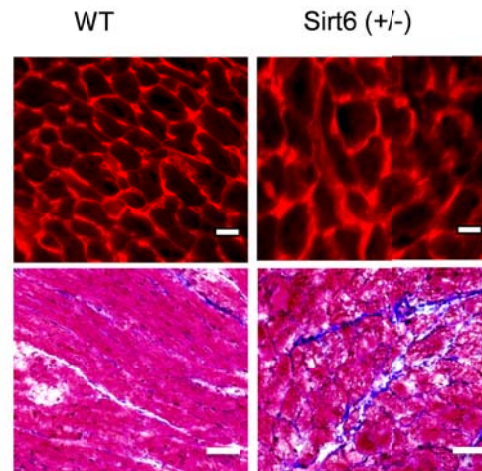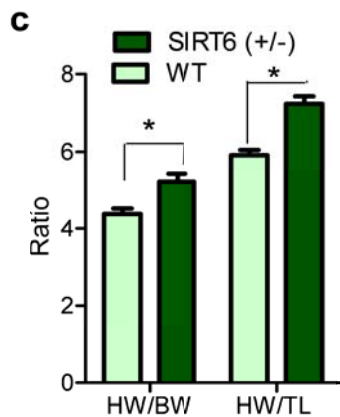

### Supplementary figure 1: Reduced SIRT6 levels lead to induction of cardiac hypertrophy.

**(a)** Quantification of SIRT6 levels in non-failing and failing human hearts (for details see supplementary table1). **(b)** Hypertrophy of SIRT6 (+/-) hearts, compared to WT control at 6 months of age. **(c)** HW/BW and HW/TL ratios in WT and SIRT6 (+/-) mice. **(d)** Heart sections showing increased cardiomyocyte size (scale bar 10 $\mu$ M) and fibrosis (bar 40 $\mu$ M) in SIRT6 (+/-) hearts compared to WT controls.

## Supplementary Figure 2

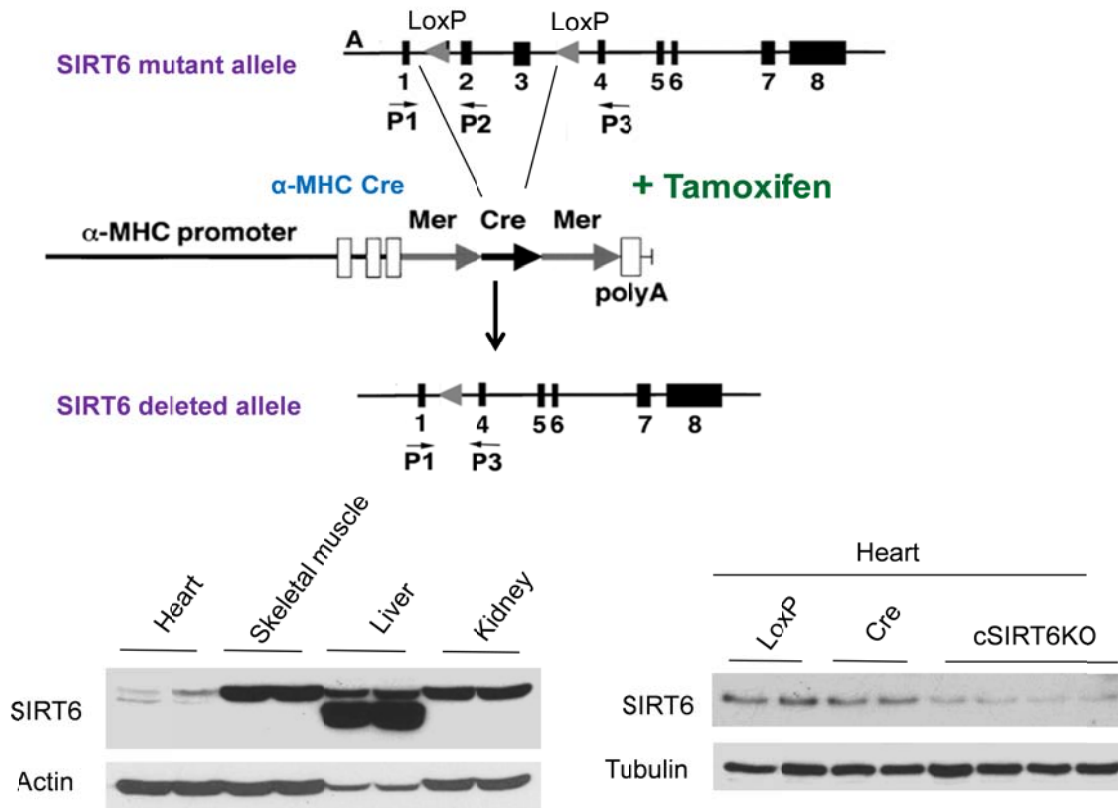

**Supplementary figure 2: Generation of inducible cardiac specific SIRT6 knockout mice.** Mice carrying both *loxp/loxp* and *α-MHC-Cre* alleles were injected with tamoxifen at 4 weeks of age for three consecutive days. SIRT6 deletion was determined by western blotting of different tissue lysates.

### Supplementary Figure 3

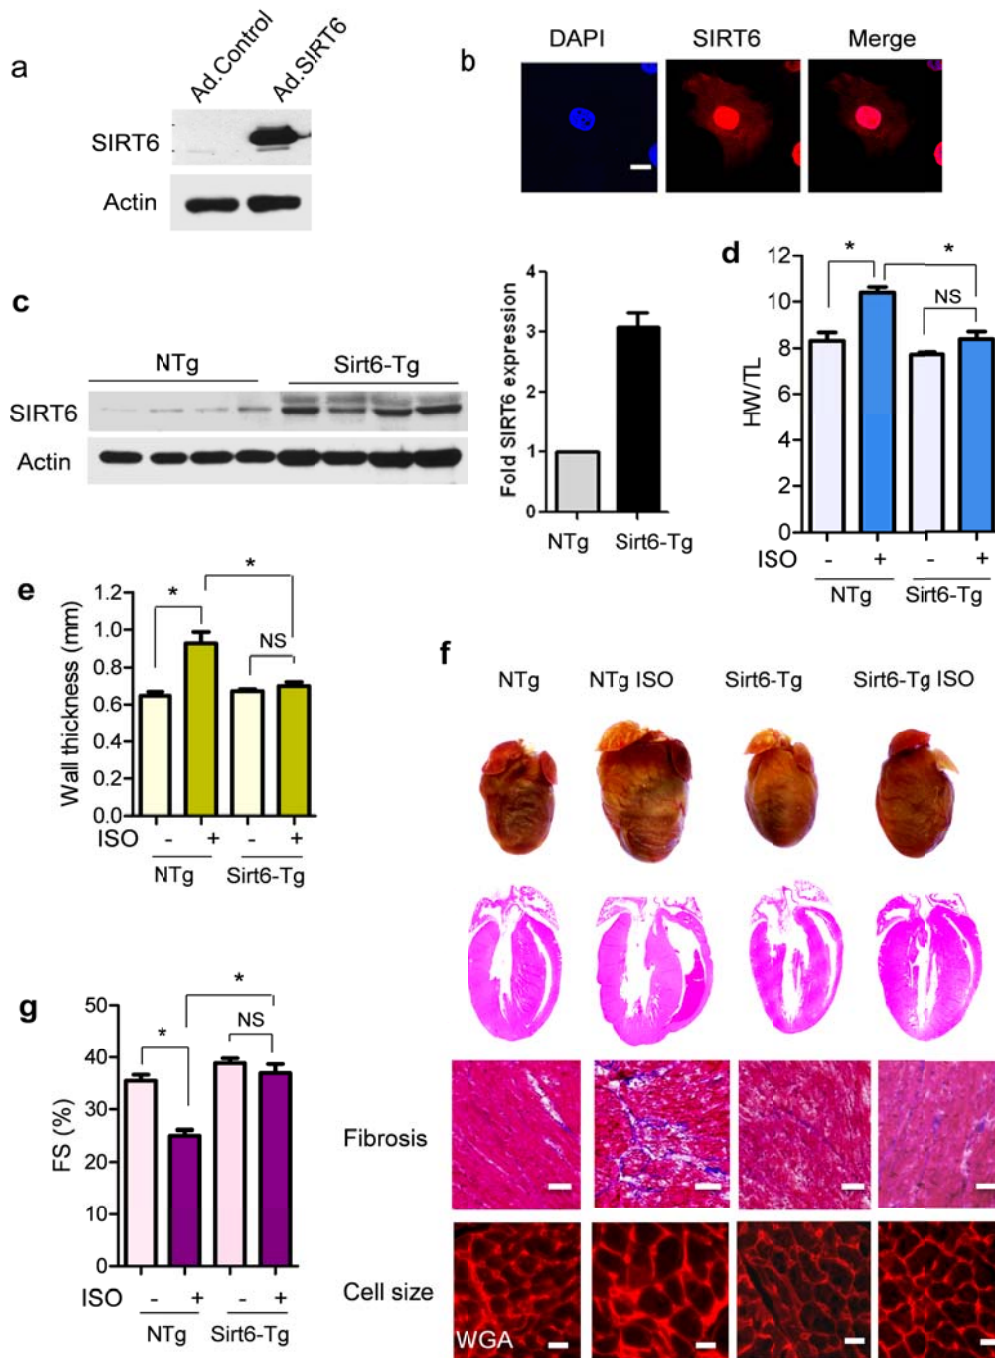

**Supplementary figure 3: SIRT6 over expression blocks agonist-mediated cardiac hypertrophy.** (a) Western blots showing expression of SIRT6 adenovirus in cardiomyocytes. (b) Nuclear localization of SIRT6 in cardiomyocytes (scale bar 10 $\mu$ M). (c) Expression levels of SIRT6 in non-transgenic (NTg) control and SIRT6.Tg hearts. Mean  $\pm$  SD, n=4. (d) N.Tg and SIRT6-Tg mice were treated with vehicle or isoproterenol (ISO, 8.7 mg/kg/d for 7 days), and their HW/TL ratio was determined; mean  $\pm$  SD, n =5-6. (e) Left ventricular wall thickness as determined by echocardiography. Mean  $\pm$  SD, n = 5-6. (f) Representative whole hearts and heart sections of N.Tg and SIRT6-Tg mice subjected to develop ISO-mediated hypertrophy. Scale bar to detect fibrosis 40 $\mu$ M, and for cell size 10 $\mu$ M. WGA indicates wheat germ agglutinin. (g) Fractional shortening of same mice as in panel e. Mean  $\pm$  SD, n = 5-6. \*p<0.001.

## Supplementary Figure 4

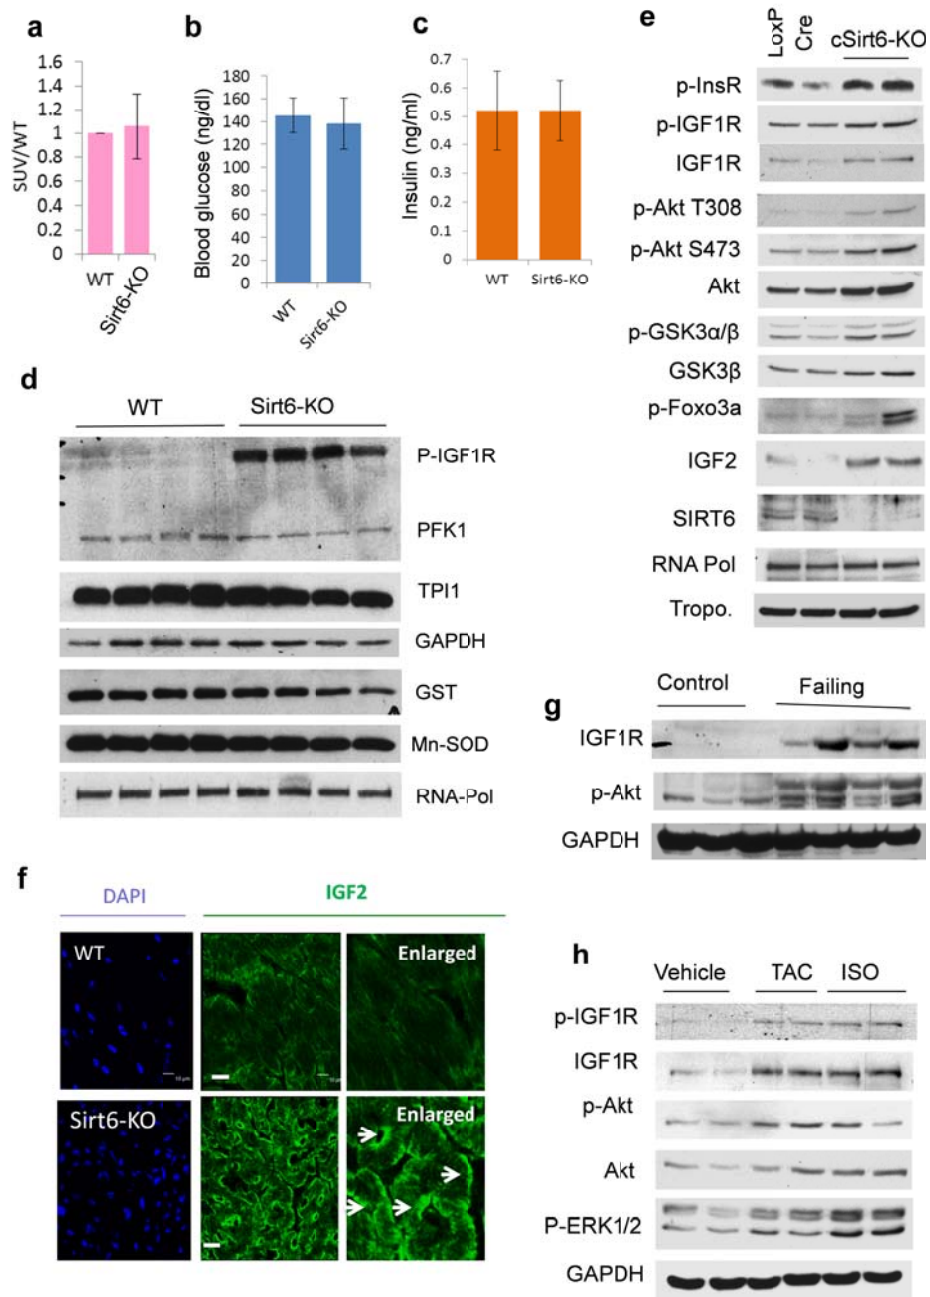

**Supplementary figure 4: Biochemical characteristics of SIRT6-deficient hearts.** (a) Standard uptake value (SUV) ratio of labeled  $^{18}\text{F}$ FDG-Glucose incorporation in the heart of WT and SIRT6-KO mice,  $n = 3$ . (b) Blood glucose levels in WT and SIRT6KO mice at 3 months of age. (c) Serum insulin levels of the WT and SIRT6KO mice at 3 months of age,  $n = 10-12$ . (d) Western analysis of Hif-1 $\alpha$  target glycolytic genes and NF- $\kappa$ B target antioxidant genes. Phospho-IGF1R is used as positive control. (e) Western analysis of IGF signaling related genes in controls and cardiac-specific SIRT6KO (cSIRT6KO) heart lysates. (f) Confocal images showing membrane localization of IGF2 (green) in WT and SIRT6KO hearts (scale bar 10 $\mu$ M). Arrows indicate membrane bound IGF2 in myocytes. (g) Western analysis of control and failing human heart lysates. (h) Western analysis of IGF/Akt signaling related targets in control and hypertrophied mouse heart lysates. Cardiac hypertrophy was induced by pressure overload (TAC) or isoproterenol (ISO) infusion in mice.

## Supplementary Figure 5

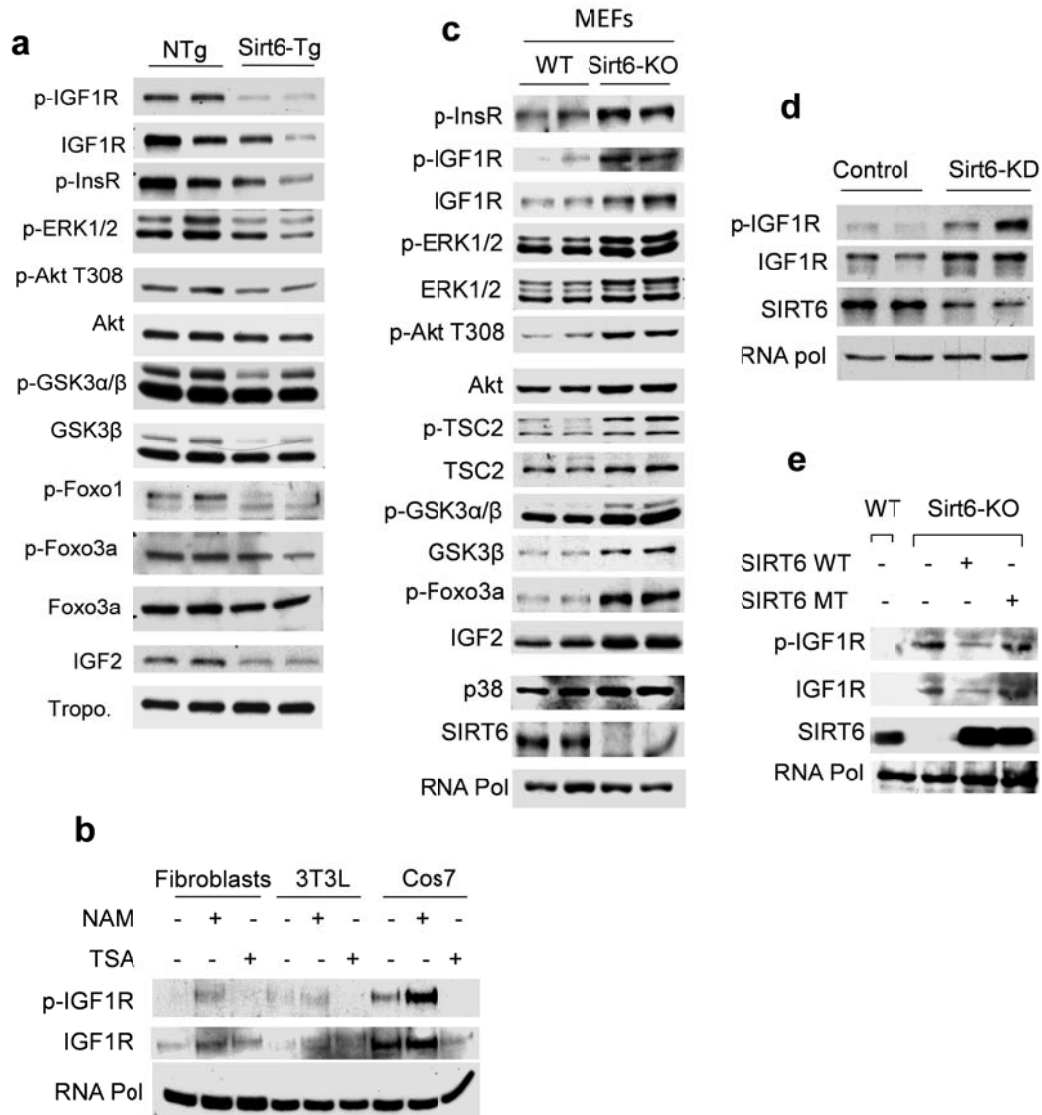

**Supplementary figure 5: Western analysis of IGF signaling related genes. (a)** Expression levels of IGF signaling related genes in NTg and SIRT6-Tg hearts. **(b)** Expression and phosphorylation of IGF1R in vehicle, nicotinamide (NAM) and trichostatin-A (TSA) treated cells. **(c)** Increased expression and phosphorylation of IGF signaling related genes in WT and SIRT6-KO MEFs. **(d)** IGF1R levels in control and SIRT6-KD 293T cells. **(e)** Over expression of WT, but not the mutant (MT) SIRT6 suppressed the IGF1R signaling in SIRT6-KO fibroblasts.



Supplementary Figure 6

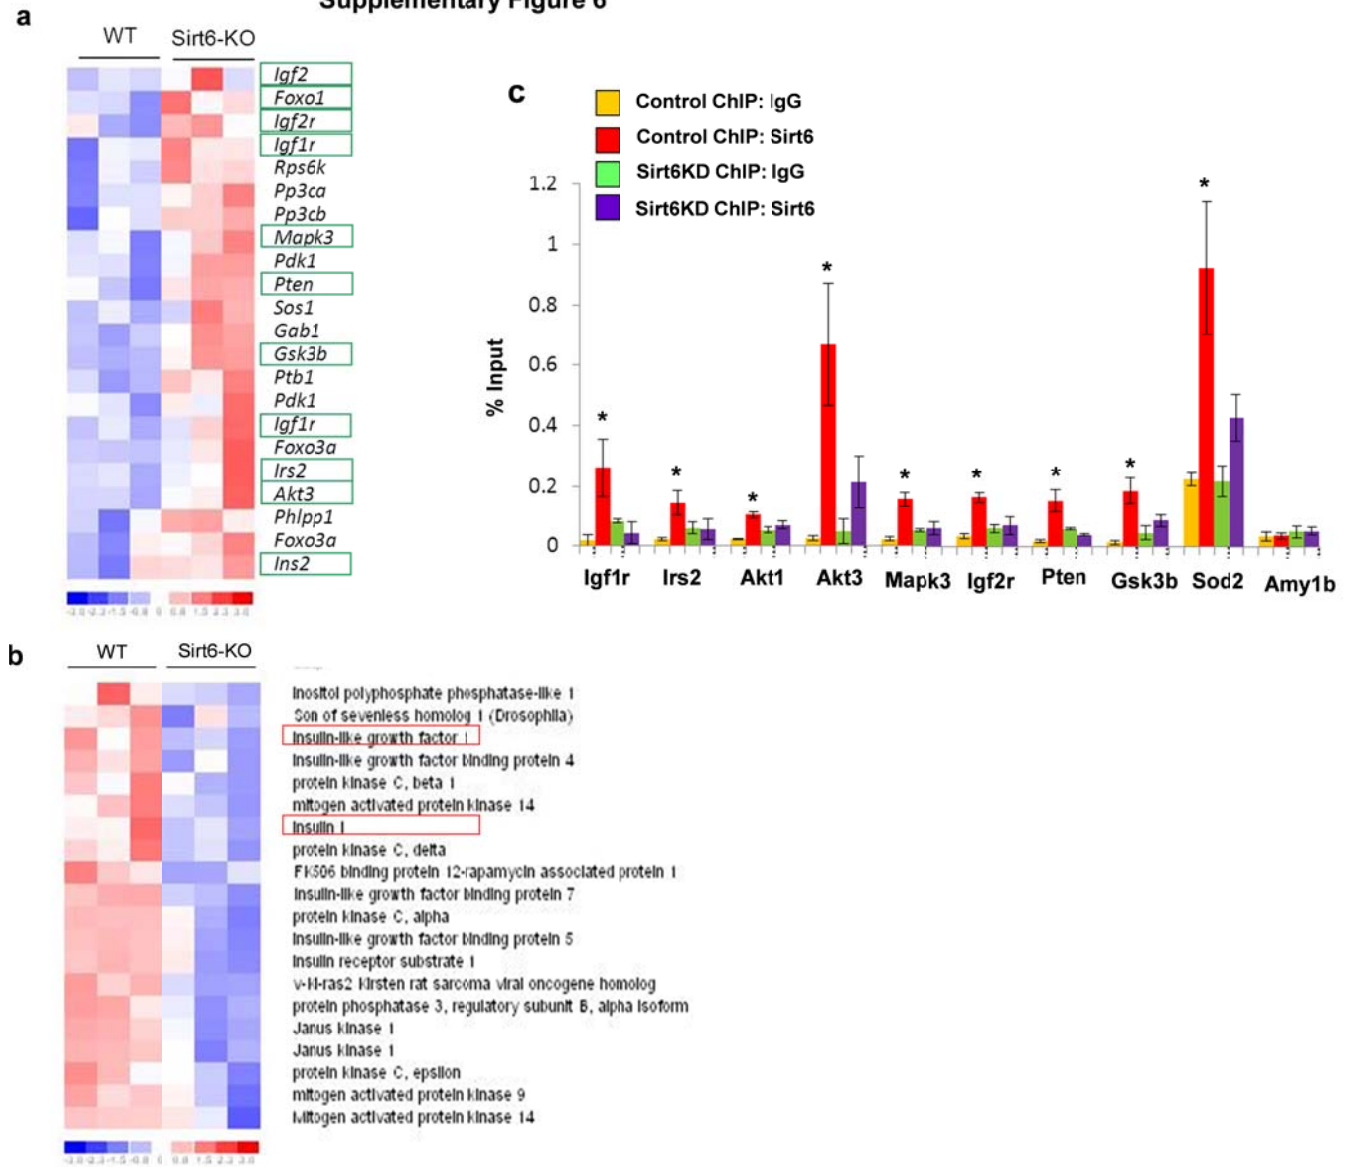

**Supplementary figure 6: SIRT6-dependent regulation of IGF signaling related genes. (a and b)** Comparative microarray analysis of IGF signaling related genes in wild type and SIRT6-KO skeletal muscle samples. **(c)** The ChIP analysis data from Fig. 4e is shown without normalization as % input.

## Supplementary Figure 7

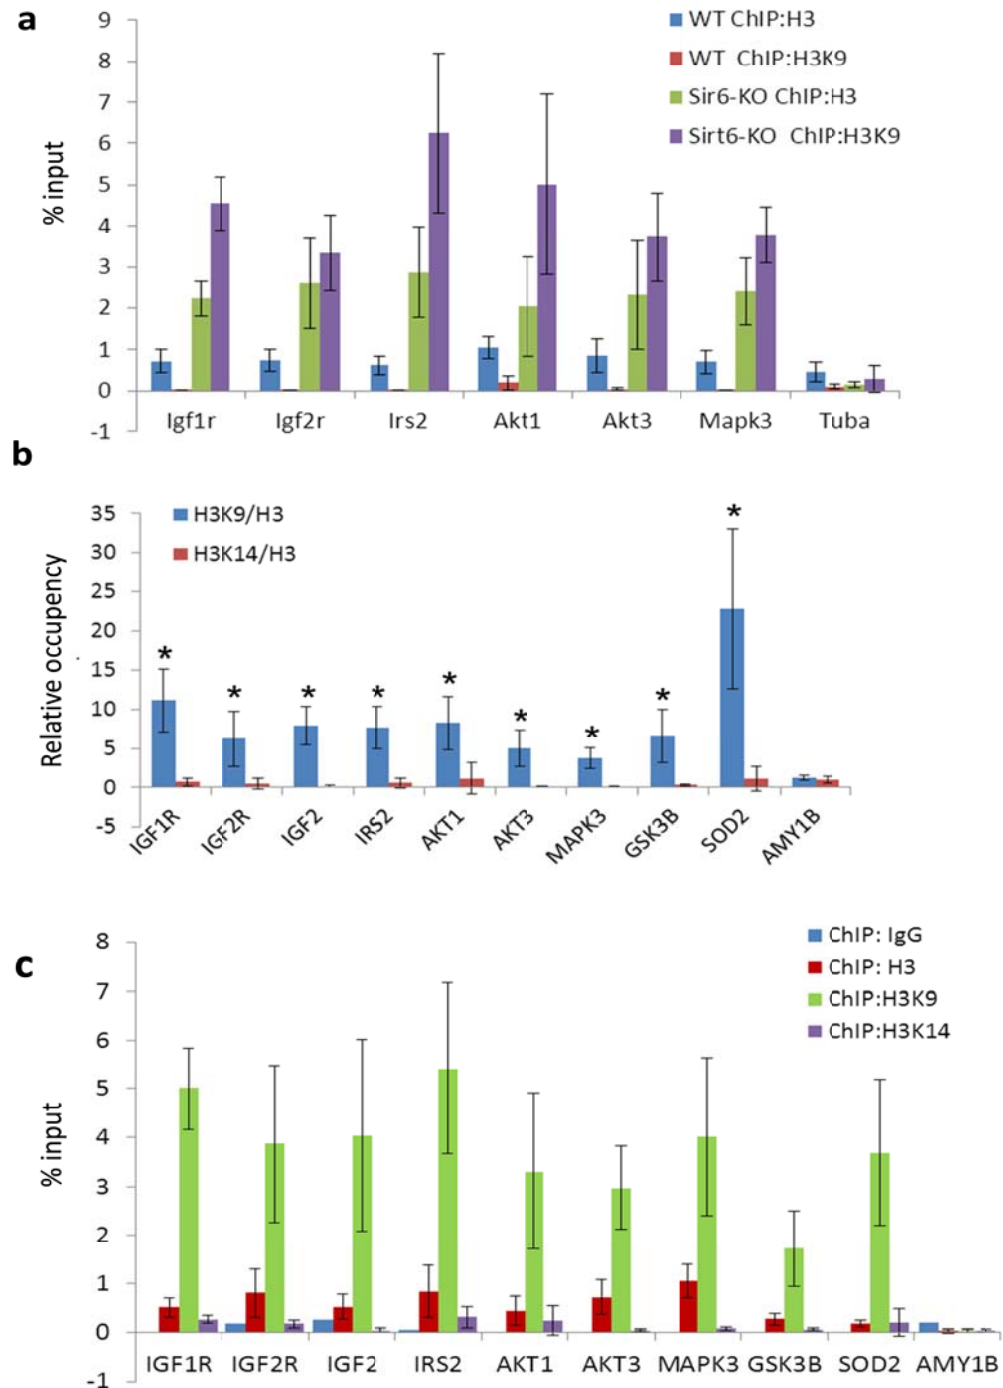

**Supplementary figure 7: The ChIP analysis with wild-type and SIRT6 knockout hearts and cells.** (a) The ChIP analysis was performed in WT and SIRT6-KO heart samples with use of Ac-H3K9 (H3K9) and H3 antibodies. Acetylation of H3K9 at promoters is shown relative to total H3 levels and the data is shown as % input. (b and c) ChIP analysis was performed with use of Ac-H3K9, Ac-H3K14 and H3 antibodies in SIRT6-KD stable 293T cells. The data presented as either normalized with H3 levels (b) or shown without normalization as % input (c).



## Supplementary Figure 8

### Insulin-like growth factor I receptor (Igf1r) promoter

Mouse acggcagcggcgctgctcggctt**tgaccttcagcga**gcccggagcccccgcgcacggagtc  
 Rat acggcagcggcgctgctcggctt**tgaccttcagcga**gcccggagcccccgcgcacggagtc  
 Human acggcagcggcgctcgc-cctcggctt**tgaccttcagcga**gcccggagcccccgcgcacggagtc  
 Opossum acaacacctc-----ttcggctt**tgaccttcagcga**aaccggatcccccctacgttcgga  
 -85

### Insulin-like growth factor II receptor (Igf2r) promoter

Mouse ggacg**tcacgtga**g-----caggaggcggggcggggcccgaactcagg**tcacgtga**cgcctcggggacgg  
 Rat gaacg**tcacgtga**g-----aggaggcggggcaggggcccgaactcagg**tcacgtga**cgccttggggacgg  
 Human gggag**tcacgtga**gcgggggcccggggggcggtgcggggcggctg**tcacgtga**cgcggttccggggg  
 Orangutan gggag**tcacgtga**gcgggggcccggggggcggtgcggggcggctg**tcacgtga**cgcggttccggggg  
 Opossum tgcg**tcacgtga**gcgggggaggggtgaaggcagggcagcagtagagccggaccagcggggcagagca  
 -49 -8

### Thymoma viral proto-oncogene 1 (Akt1) promoter

Mouse gcctccag**ggcgctaagtcagag**gctcagcag//taag-gactc**gggtgacagggga**ggacgggagca  
 Rat gcctccag**ggcgctaagtcagag**gcccagtag//taag-gactc**gggtgacagggga**ggagggggca  
 Chimpanzee acctccag**ggggccaagtcagag**gcccagtag//aggggactt**ggggagtgaggga**gaagaggggca  
 Human acctccag**ggggccaagtcagag**gcccagtag//aggggactt**ggggagtgaggga**gaagaggggca  
 Orangutan acctccag**ggggccaagtcagag**gcccagtag//aggggactt**ggggagtgaggga**gaagaggggca  
 Rhesus acctccag**ggggccaagtcagag**gcccagtag//aggggactt**ggggagtgaggga**gaagaggggca  
 -1000 -431

### Thymoma viral proto-oncogene 3 (Akt3) promoter

Mouse ctttcttcaataacttccttca**ggctgagtcatca**ctagagagtgggaaagggcagcagcagcagca  
 Rat ttttcttcaataacttccttca**ggctgagtcatca**ctagagagtgggaaagggcagcagcagcaaca  
 Human ctttcttcaataacttccttca**ggctgagtcatca**ctagagagtgggaaagggcagcagcagcagagaat  
 Orangutan ctttcttcaataacttccttca**ggctgagtcatca**ctagagagtgggaaagggcagcagcagcagagaat  
 Dog ctttcttcaataacttccttca**ggctgagtcatca**ctagagagtgggaaagggcagcagcagcagagaat  
 Horse ctttcttcaataacttccttca**ggctgagtcatca**ctagagagtgggaaagggcagcagcagcagagaat  
 Opossum ctttcttcaataacttccttca**ggctgagtcatca**ctagagagtgggaaagggcagcagcagcaaaagag  
 -115

### Insulin receptor substrate 2 (Irs2) promoter

Mouse cgt**aacgcagagtcac**atggttgttttgct---ct**agttcagtcactc**gggtcgcgatgt**gttactcad**tgt  
 Rat cgt**aacgcagagtcac**atggttgttttgct---ct**agttcagtcactc**gggtcgcgatgt**gttactcad**tgt  
 Human cgt**aacgccagagtcac**atggttgttttgctcttct**agttcagtcactc**gggtcgcgatgt**gttactcad**tgt  
 Opossum cgt**aacgcagagtcac**atggttgttttgctct--t**agttcagtcactc**aggtcgcgatgt**gttactcad**tgt  
 -553 -524 -499

### Phosphatase and tensin homolog (Pten) promoter

Mouse caagaggcggggcagggaaaccggagcccga**tgagggtga**ccacgcgggagacacaatagggg  
 Rat caagaggcggggcagggaaaccggagcccga**tgagggtga**ccacgcgggagacacaatagggg  
 Human cgaaaggtggggcgctgcaagggagccgg**tgagggtga**tacacgcctggcagacacaatagcag  
 Orangutan cgaaaggtggggcgctgcaagggagccgg**tgagggtga**tacacgcctggcagacacaatagcag  
 Horse caggaggtggggcggtgaaagggagcccga**tgagggtga**tacacactggagacacaatagggg  
 -585

### Mitogen-activated protein kinase 3 (Mapk3) promoter

Mouse ggcgggaaagccgggtgcgcgccagagaccat**gtgacgct**ccggggcc  
 Rat ggcgggaaagccgggtgcgcgccagagaccat**gtgacatc**ccggggcc  
 Human ggcaagaagggcgggcccgcgcggggcgggtc**gtgacagc**ccaggcc  
 Chimpanzee ggcaagaagggcgggcccgcgcggggcgggtc**gtgacagc**ccaggcc  
 Orangutan ggcgagacgggcccgcgcgcggggtc**gtgacggc**ccaggcc  
 -135

### Glycogen synthase kinase 3 beta (Gsk3b) promoter

Mouse ttctcttaggattcgaggtac-tgt**cctgaccacat**ttccccctcacctgttttcggggctgct  
 Rat ttctcttaggattcgaggtat-cgg**cctgaccacat**ttccccctcacctgttttcggggctgct  
 Human ttctctggaggcttcaggatatccgg**cctgacggcat**ttccccctcacctgttttcggggcccg  
 Orangutan ttctctggaggcttcaggatatccgg**cctgacggcat**ttccccctcacctgttttcggggcccg  
 Dog ttctctggaggcttcaggatatccgg**cccagcggcgt**ttccccctcacctgttttcggggctcg  
 Horse ttctctggaggcttcaggatatccgg**cctgacggcat**ttccccctcacctgttttcggg-cccgt  
 Opossum tttcaccagggcctaaggatatccgg**tatgactccgt**ttccccctcacctgttttcgggaccact  
 -792

## Mechanistic target of rapamycin (serine/threonine kinase) (Mtor) promoter

|           |                                                                      |
|-----------|----------------------------------------------------------------------|
| Mouse     | acttgtagtagcgacg----taccggaagtgttcggtg---gaagtgaccga-<br>agtcaactcac |
| Rat       | actagtagtagcgacg----taccggatgtgtgtgtgtgggaagtgaccga-<br>agtcaactcac  |
| Human     | aatcctagcagcgccg----taccggatgtgtgagtg---gaagtgactga-<br>ggtgaactcac  |
| Chimp     | aatcctagcagcgccg----taccggatgtgtgagtg---gaagtgactga-<br>ggtgaactcac  |
| Orangutan | aatcctagcagcgccg----caccggatgtatgagtg---gaagtgactga-<br>ggtcaactgac  |
| Rhesus    | aatcctagcagcgccg----caccggatgtatgagtg---gaagtgactga-<br>ggtcaactcac  |
| Opossum   | gctcattcaacgcagcactcactggaagccgggtcg---gaagtggctga-<br>agtcaactcgc   |

-221

## Aldolase C, fructose-bisphosphate (ALDOC) promoter

|           |                                                                               |
|-----------|-------------------------------------------------------------------------------|
| Mouse     | cccc---agggagt <b>ca</b> ggtgactctgcggaagtgtgccaccttatttactccagcttggaccgagcta |
| Rat       | cccc---agggagt <b>ca</b> ggtgactctgcgatctgctgctgcttatttactccagcttggactgagcta  |
| Human     | ccc---cggaggagt <b>ca</b> ggtgactctgacatccgcagcctcatttaccagaggagccagggtgcagc  |
| Orangutan | ccct-cggaggagt <b>ca</b> ggtgactctgacatccgcagcctcatttaccagaggagccagggtgcagc   |
| Dog       | ccct-cggaggagt <b>ca</b> ggtgactctgcgcatccgcagcctcatttaca---ggaggctgagctagagc |
| Horse     | cccccgggggagt <b>ca</b> ggtgactctgcgcatccgcagcctcatttaca---ggaggctgagctgagc   |
| Opossum   | ctcc-gctggagt <b>ca</b> ggtgactctgcgcatccgcagcctcttttacc---ggagcccagcccgatc   |

-1102 AP-1      -1098 HIF-1 $\alpha$

## Lactate dehydrogenase A (LDHA) promoter

|           |                                                                                      |
|-----------|--------------------------------------------------------------------------------------|
| Mouse     | agcctacacgtgggttcccc <b>gcacgt</b> ccgct-gggt--cc-cact <b>tgacgtca</b> c-gcggagcttcc |
| Rat       | agcctacacgtgggttcccc <b>gcacgt</b> ccgct-gggt--tc-cact <b>tgacgtca</b> c-acggagcttcc |
| Human     | gactcacacgtgggttcccc <b>gcacgt</b> ccgcc-ggccc--cc-ccc <b>tgacgtca</b> c-atagctgttcc |
| Orangutan | gactcacacgtgggttcccc <b>gcacgt</b> ccgcc-ggcccccc-ccc <b>tgacgtca</b> c-atagctgttcc  |
| Rhesus    | gaccacacgtgggttcccc <b>gcacgt</b> ccgcc-ggccc--cc-ccc <b>tgacgtca</b> c-atagctgttcc  |
| Dog       | gaccacacgtgggttcccc <b>gcacgt</b> ccgcc-cggt--gc-ccc <b>tgacgtca</b> c-ctcgcttcc     |
| Horse     | gaccatacgtgggttcccc <b>gcacgt</b> ctcc-cagtt---c-ccc <b>tgacgtca</b> c-cgcgcgttcc    |
| Opossum   | atcccacacgtgggttcc <b>gcacgt</b> ccgct-cccag--cc-ccc <b>gaacgtca</b> gctttttggtggt   |

-34 HIF-1 $\alpha$       -11 c-Jun

## Lactate dehydrogenase B (LDHB) promoter

|           |                                                                                                          |
|-----------|----------------------------------------------------------------------------------------------------------|
| Mouse     | ggaagt <b>gac</b> ctcttacttttagagagcggggagag-- <b>cgcg</b> tg <b>ca</b> ctccagc-cttgtccttgaagg           |
| Rat       | agaagt <b>gac</b> cttccacttttagagagcggggagag <b>ca</b> g <b>cgcg</b> tg <b>ca</b> ctccagc-cttgtccttgaagg |
| Human     | ggaagt <b>gagac</b> ctcctatctggaggtgggggaggg-- <b>agtgtg</b> ca <b>c</b> acttgacccttgctccttgaagg         |
| Orangutan | ggaagt <b>gac</b> ctccttttgggagatgggggaggg-- <b>gtgtg</b> ca <b>c</b> acttgacccttgtccttgaagg             |
| Rhesus    | ggaagt <b>gac</b> cccctatctggaggtgggggaggg-- <b>agtgtg</b> ca <b>c</b> acttgacccttgtccttgaagg            |
| Dog       | ggaagt <b>gac</b> ctcct-----caggggagggagag-- <b>cgcg</b> tg <b>ca</b> cttgacccttgtccttgaagg              |
| Horse     | agaagt <b>gac</b> ctcctatt--tggggagggcggg-- <b>cg</b> tg <b>ca</b> cttgacccttgtccttgaagg                 |
| Opossum   | -----ctctccccagcataggggaagga-- <b>cg</b> act <b>gca</b> acttgacccttgtccttgaagg                           |

-173 AP-1      -141 HIF-1

**Supplementary figure 8: In-silico analysis of evolutionarily conserved c-Jun binding sites in the promoters of different genes.** The transcription factor binding site analysis was done using TRANSFAC software (Biobase GmbH); evolutionary conservation analysis was carried out using UCSC Genome Browser. Nucleotide sequences in bold denote AP-1/c-Jun consensus binding sites, and number below denotes distance (bp) from the transcription start site of the respective mouse gene. Upon extensive analysis, we confirmed that InsR does not have any conserved binding site for AP1/c-Jun, though it showed increased expression in SIRT6KO hearts. Interestingly, our in silico analysis does not find any c-Jun binding sites in HIF-1 $\alpha$  target glycolytic genes, PFK1, TP11, PDK1 and GAPDH. However, few glycolytic genes especially ALDOC, LDHA, and LDHB have both c-Jun and HIF-1 $\alpha$  binding sites very close to their proximal promoter regions.

a

## Supplementary Figure 9

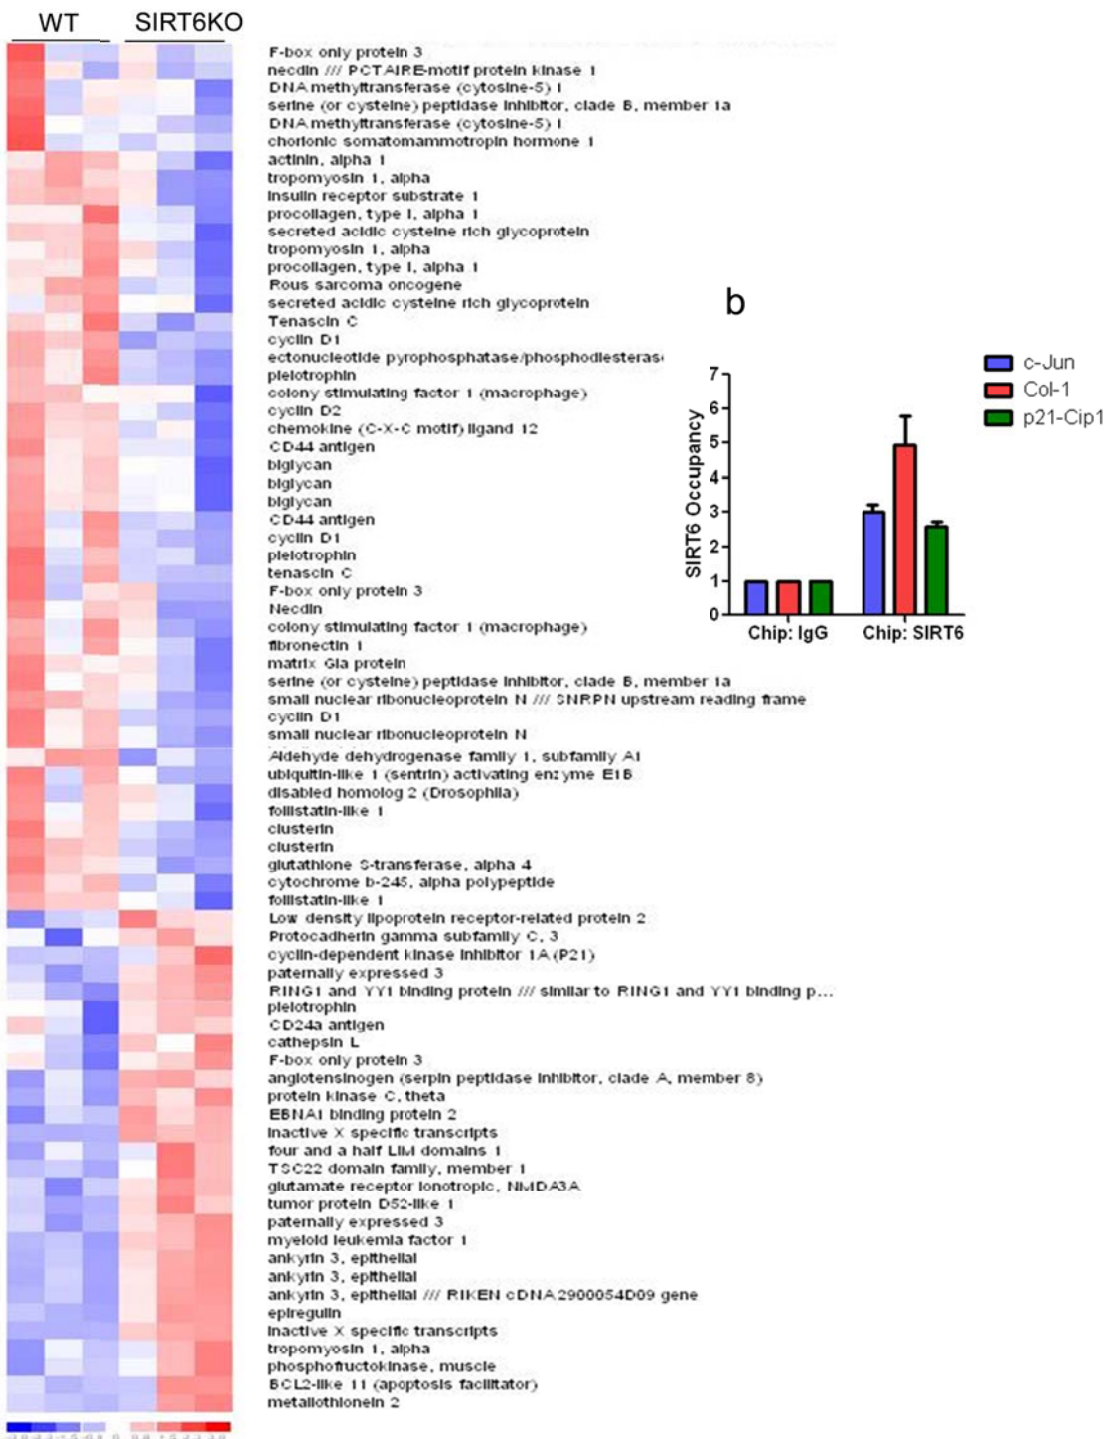

**Supplementary figure 9: Analysis of AP1 target genes. (a)** Comparative microarray analysis of AP-1 target genes in wild type and SIRT6-KO skeletal muscle samples. **(b)** ChIP analysis showing SIRT6 binding to AP1 target gene promoters. Mean  $\pm$  SD, n = 3.

### Supplementary Figure 10

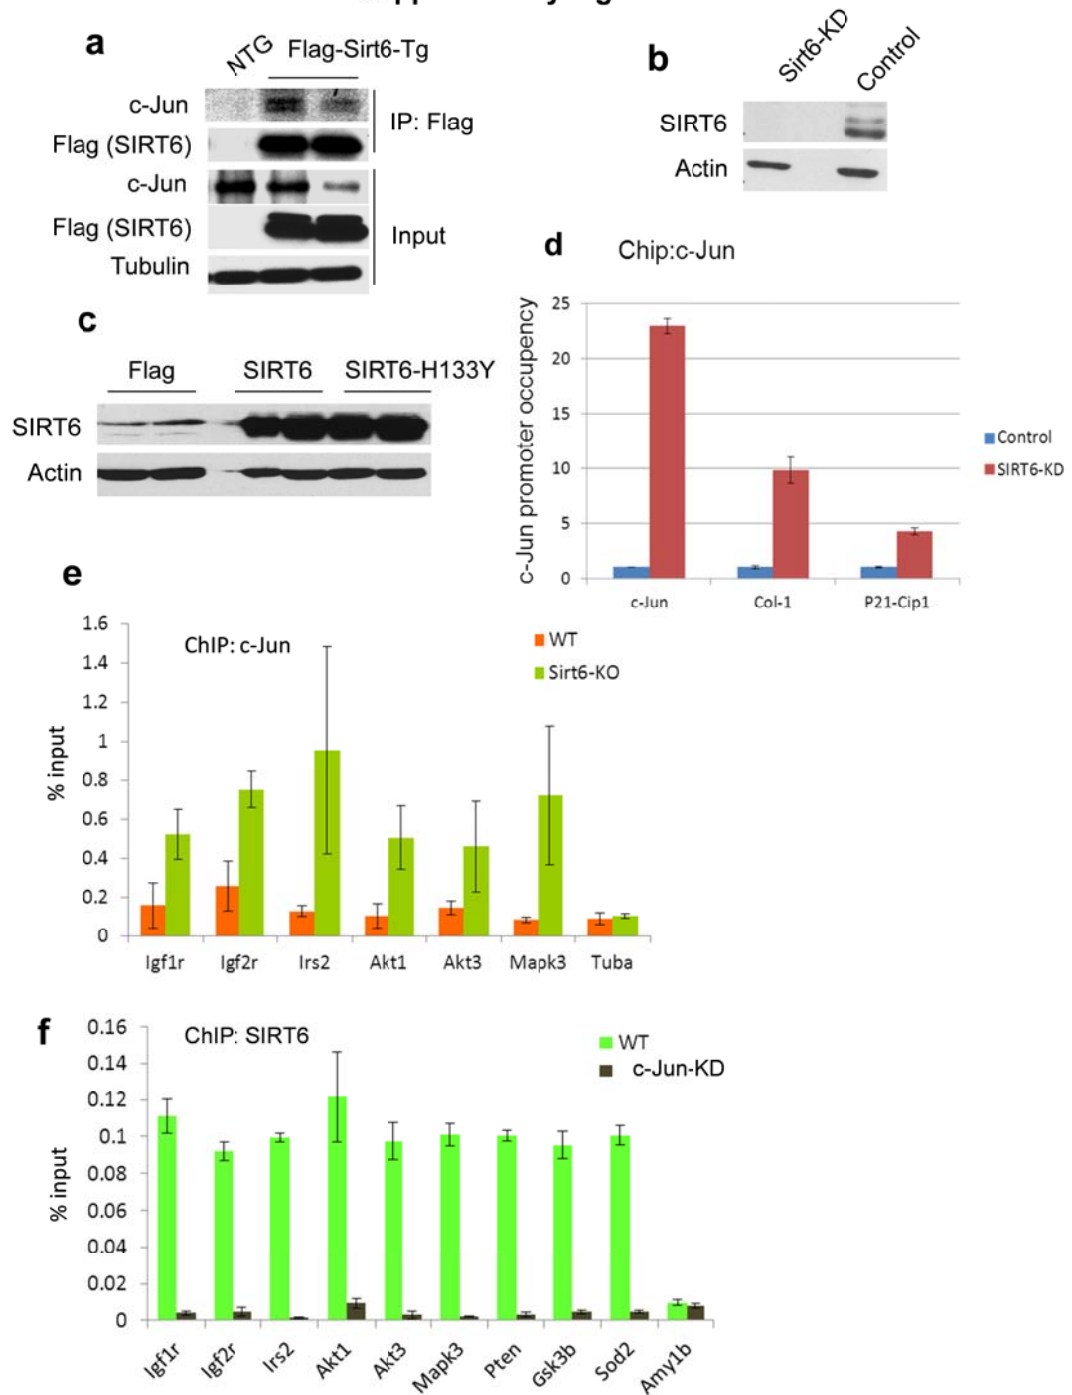

**Supplementary figure 10: SIRT6 associates with c-Jun on IGF signaling related genes. (a)** SIRT6 was immunoprecipitated from the SIRT6 transgenic mouse hearts using Flag-tag specific antibody. The interaction of SIRT6 with c-Jun was determined by western blotting. **(b and c)** SIRT6 levels in SIRT6KD (b) and overexpressing (c) cells determined by western blotting. **(d)** The ChIP analysis of c-Jun occupancy in the promoters of IGF signaling related genes of control and SIRT6-KD stable 293T cells. **(e)** The ChIP analysis data from Fig. 5e is presented without normalization as % input. **(f)** The ChIP analysis data from Fig. 5f is shown without normalization as % input.

## Supplementary Figure 11

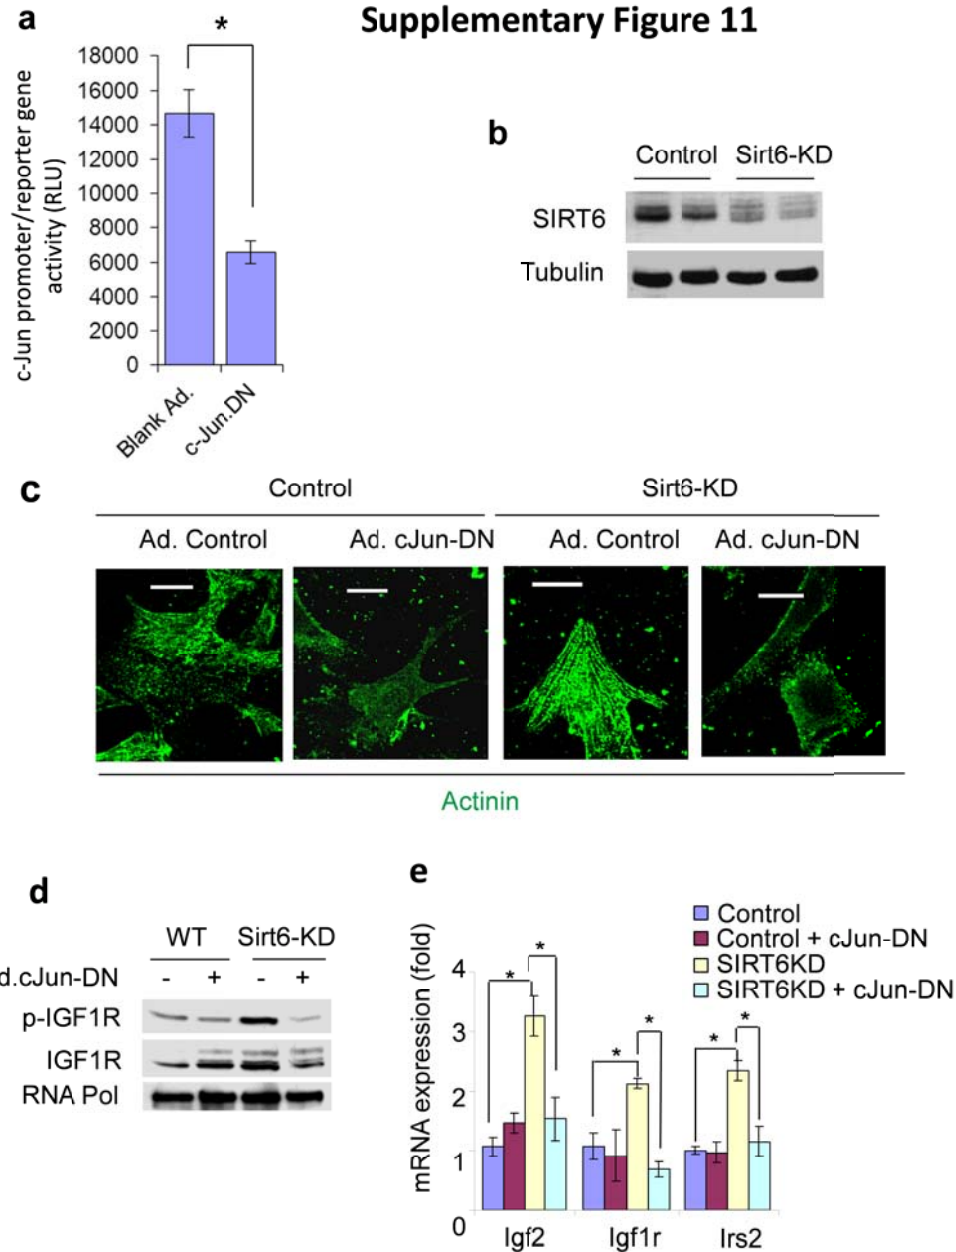

### Supplementary figure 11: c-Jun inhibition blocks hypertrophy of SIRT6-KD cardiomyocytes.

**(a)** A promoter/ reporter assay showing that adenovirus vector expressing dominant negative (DN) form of c-Jun inhibits activity of endogenous c-Jun. **(b)** Western blots showing SIRT6 knockdown in neonatal rat cardiomyocytes by use of lentiviral vectors (Open Biosystem). **(c)** Confocal imaging of control and SIRT6KD cardiomyocytes over expressed with dominant-negative (DN) form of c-Jun and stained for actinin to visualize sarcomere organization (scale bar 20 $\mu$ M). **(d)** Western blot analysis of IGF1R expression and phosphorylation in WT and SIRT6-KD cardiomyocytes infected with control or c-Jun-DN adenovirus. **(e)** Real-time PCR analysis of representative IGF2 signaling related genes in WT and SIRT6-KD cardiomyocytes infected with control or c-Jun-DN adenovirus. Mean  $\pm$  SD, n=3-5, \*p<0.001.



Supplementary Figure 12

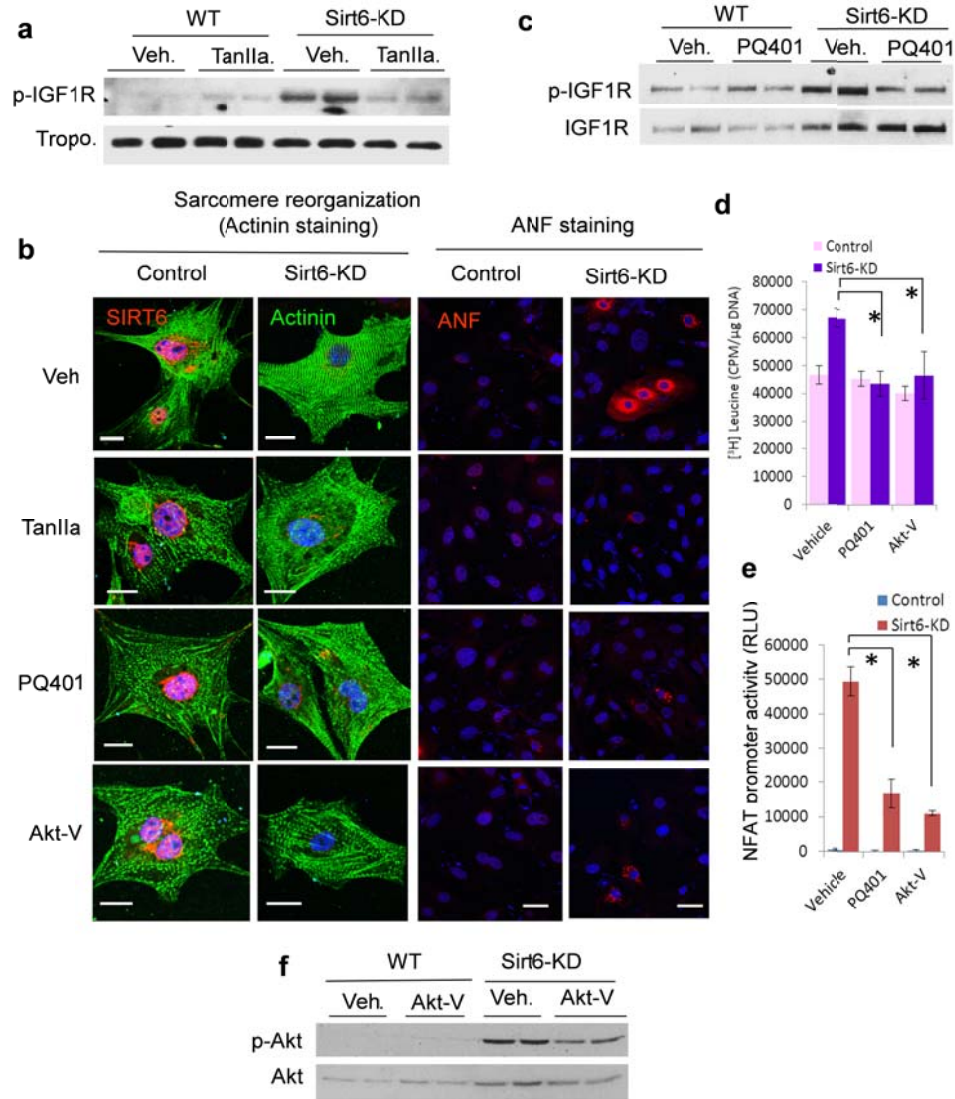

**Supplementary figure 12: AP1 and IGF-Akt signaling inhibitors block hypertrophy of SIRT6-deficient cardiomyocytes in vitro.** (a) Western analysis of IGF1R phosphorylation in WT and SIRT6KD neonatal rat cardiomyocytes treated with vehicle or Tan-IIa. (b) Sarcomere organization and ANF expression in cardiomyocytes treated with different inhibitors. Sarcomeric organization was determined by staining cells for sarcomeric  $\alpha$ -actinin (green) and SIRT6 (red) (Scale bar 20 $\mu$ M). ANF release (red) was determined by staining cells with an anti-ANF antibody. DAPI stain was used to mark position of nuclei (Scale bar 50 $\mu$ M). (c) Western analysis of IGF1R phosphorylation in cardiomyocytes treated with vehicle or the inhibitor, PQ401 (d) Control and SIRT6KD cardiomyocytes were treated with vehicle, PQ401 (10  $\mu$ M) or Akt-V (0.5 $\mu$ M) for 48 hours. Incorporation of [<sup>3</sup>H]-leucine into cellular protein was determined and normalized to DNA content of cells. (e) Cardiomyocytes were infected with control and NFAT-luciferase promoter/reporter expressing adenovirus vector and treated with vehicle, PQ401 (10  $\mu$ M) or Akt-v (0.5 $\mu$ M). Cell extracts were analyzed for luciferase activity after 24 hours. Mean  $\pm$  SD, n = 5-8, \*P < 0.001. (f) Western analysis of Akt expression and phosphorylation in WT and SIRT6KD cardiomyocytes treated with vehicle or Akt-v inhibitor.



### Supplementary Figure 13

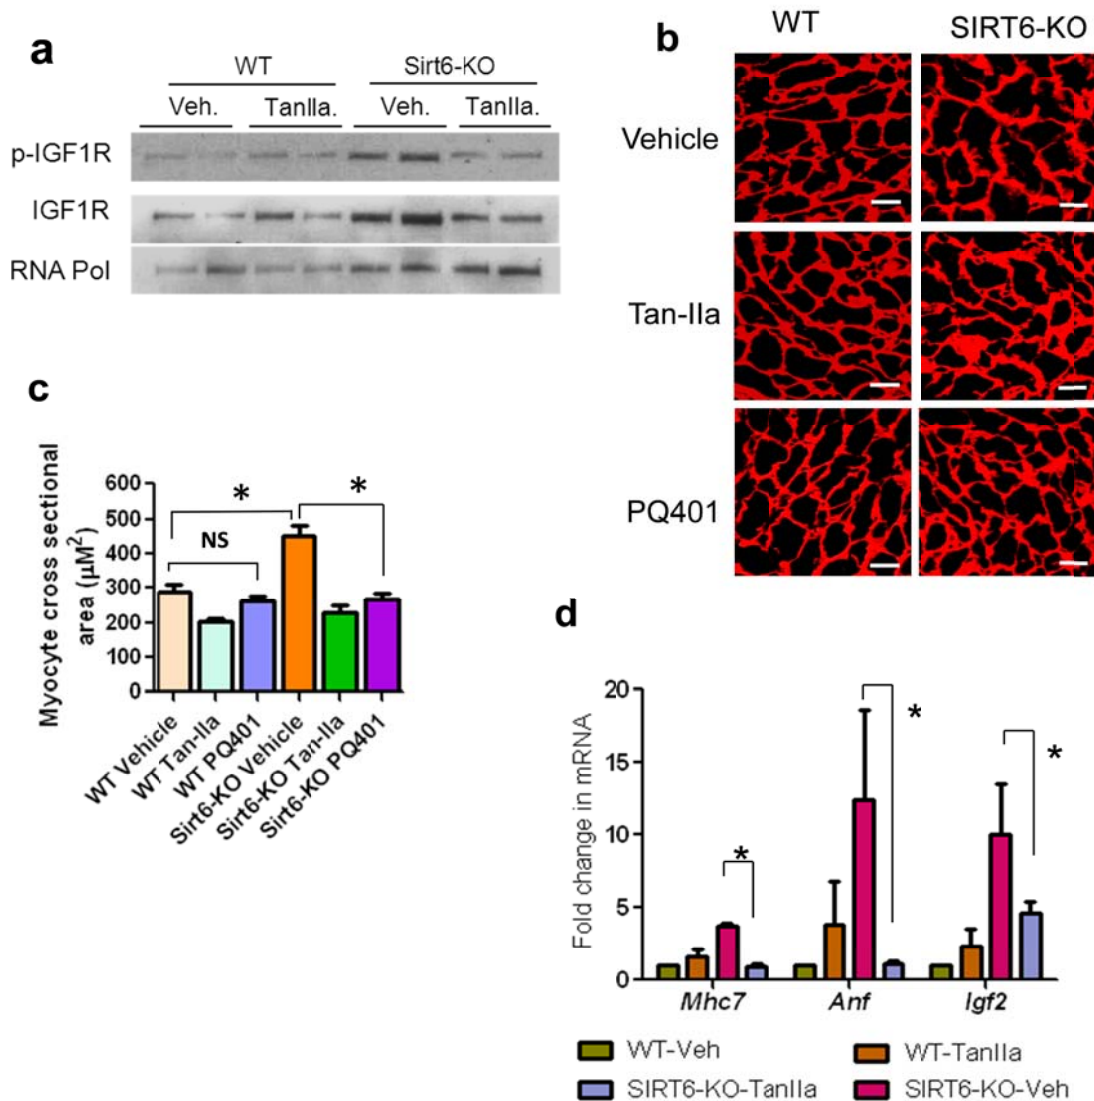

**Supplementary figure 13: AP1 and IGFR inhibitors block hypertrophy of SIRT6KO hearts.** (a) Western analysis of IGF1R expression and phosphorylation in heart lysates of WT and SIRT6-KO mice treated with vehicle or Tan-IIa. (b and c) Cardiomyocyte cross sectional area in WT and SIRT6KO mice injected with vehicle or AP1 inhibitor, Tan-IIa (1 mg/kg/day) or IGF1R inhibitor, PQ401 (1 mg/kg/day) for two weeks. Mean  $\pm$ SD, n= 6 (scale bar 10 $\mu$ M). (d) Real-time PCR analysis of cardiac fetal genes (*Mhc7* and *Anf*) and *Igf2* gene expression in WT and SIRT6-KO mice injected with vehicle or Tan-IIa. (mean  $\pm$  SD, n=4-5 mice, \*p<0.001).

## Supplementary Figure 14

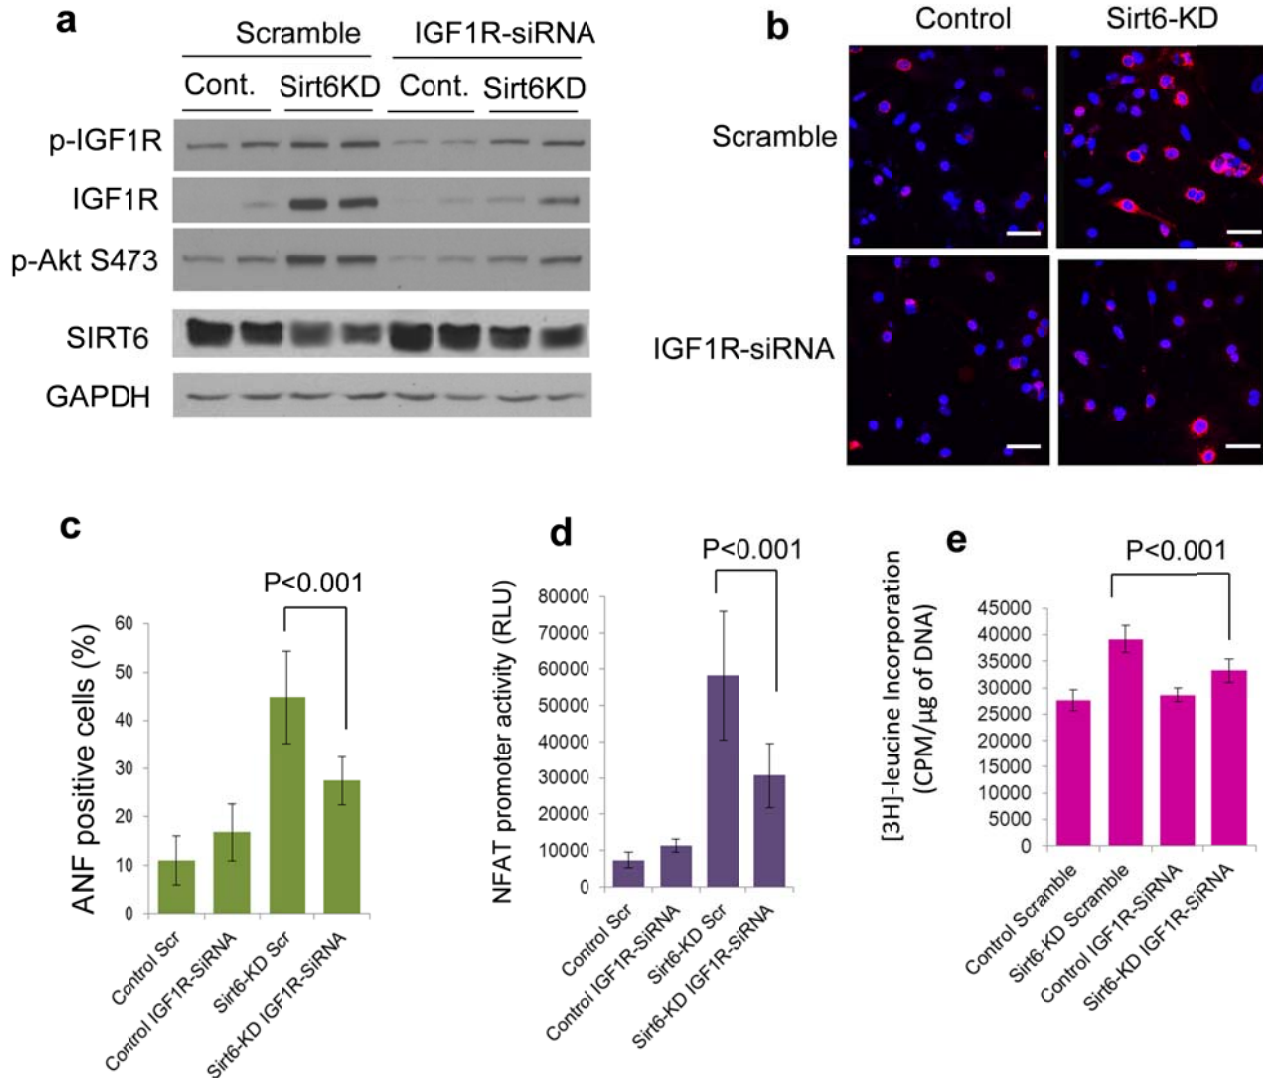

**Supplementary figure 14: IGF1R knockdown blocks hypertrophy of SIRT6-KD cardiomyocytes.** (a) Western analysis showing IGF1R knockdown in control and SIRT6-deficient (SIRT6KD) cardiomyocytes by use of siRNA. (b to e) IGF1R knockdown blocks hypertrophic response of SIRT6-deficient cardiomyocytes, as measured by ANF release from nuclei (b and c), NFAT promoter/reporter activity (d), and <sup>3</sup>H-Leucine incorporation into cellular proteins (e). Values are mean ±SD, n = 4-8. Scr indicates scrambled siRNA. Panel b scale bar 50μM.

## Supplementary Figure 15

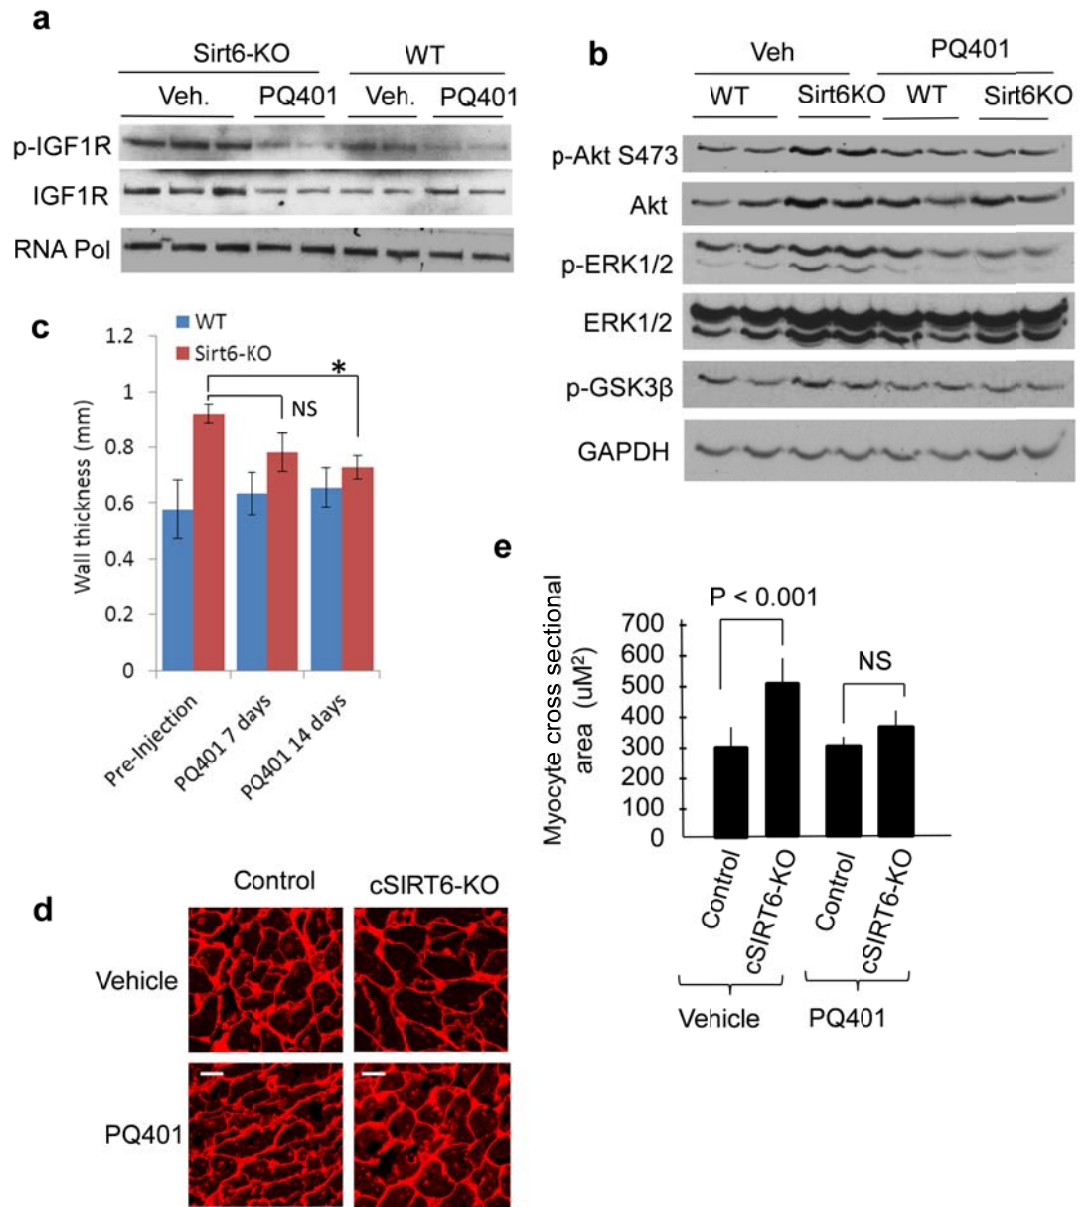

**Supplementary figure 15: IGF1R inhibitor, PQ401 blocks cardiac hypertrophy of SIRT6KO mice. (a and b)** Western analysis of the heart lysate of wild-type and SIRT6-KO mice treated with vehicle or PQ401 (1 mg/kg/day) for two weeks. **(c)** Analysis of left ventricular wall thickness in WT and SIRT6KO mice injected with vehicle or IGF1R inhibitor, PQ401 for indicated time periods. Mean  $\pm$  SD,  $n=4-5$ ,  $*p<0.001$ . **(d and e)** Cardiomyocyte cross sectional area in the WT and cardiac-specific SIRT6-KO (cSIRT6KO) mice injected with vehicle or PQ401 for two weeks. Mean  $\pm$ SD,  $n= 6-8$ . Panel d scale bar 10 $\mu$ M.

**Supplementary table 1: Clinical characteristics of patients and their corresponding cardiac SIRT6 levels.**

| Patients                  | Age | Gender | Diagnosis         | Dgn | Dbt | Medical Treatments |      |           |        | SIRT6 |
|---------------------------|-----|--------|-------------------|-----|-----|--------------------|------|-----------|--------|-------|
|                           |     |        |                   |     |     | $\beta$ -Blk       | ACEI | Diuretics | Ca-Blx |       |
| <b>Non-failing hearts</b> |     |        |                   |     |     |                    |      |           |        |       |
| NF1                       | 48  | M      | MVD               | --  | --  | +                  | --   | +         | --     | 1     |
| NF2                       | 39  | F      | MVD               | --  | --  | +                  | --   | +         | --     | 1.85  |
| NF3                       | 65  | M      | MVD               | --  | --  | --                 | --   | +         | --     | 1.5   |
| NF4                       | 50  | M      | Donor dysfunction | --  | --  | --                 | --   | --        | --     | 2.4   |
| NF5                       | 76  | M      | MVD               | --  | --  | --                 | +    | +         | --     | 1.6   |
| NF6                       | 7   | F      | VSD               | --  | --  | --                 | --   | --        | --     | 0.7   |
| NF7                       | 45  | M      | Donor dysfunction | --  | --  | --                 | --   | --        | --     | 0.7   |
| NF8                       | 38  | M      | Donor dysfunction | --  | --  | --                 | --   | --        | --     | 0.8   |
| <b>Failing hearts</b>     |     |        |                   |     |     |                    |      |           |        |       |
| F-1                       | 57  | M      | IsCMP             | NA  | NA  | NA                 | NA   | NA        | NA     | 0.1   |
| F-2                       | 56  | M      | IdCMP             | --  | +   | +                  | --   | +         | --     | 0.15  |
| F-3                       | 65  | F      | DCM               | --  | --  | +                  | +    | --        | --     | 0.25  |
| F-4                       | 55  | M      | IsCMP             | --  | --  | +                  | --   | +         | --     | 0.1   |
| F-5                       | 59  | M      | IsCMP             | --  | --  | +                  | --   | --        | --     | 0.2   |
| F-6                       | 53  | F      | IdCMP             | --  | --  | +                  | +    | --        | --     | 0.15  |
| F-7                       | 53  | M      | IsCMP             | --  | --  | +                  | +    | --        | --     | 0.3   |
| F-8                       | 66  | M      | DCM               | --  | --  | +                  | +    | +         | --     | 0.35  |
| F-9                       | 43  | F      | DCM               | --  | --  | +                  | +    | +         | --     | 0.4   |
| F-10                      | 82  | M      | DCM               | +   | --  | +                  | --   | +         | --     | 0.3   |
| F-11                      | 13  | M      | IdCMP             | NA  | NA  | NA                 | NA   | NA        | NA     | 0.8   |
| F-12                      | 26  | M      | DCM               | --  | +   | --                 | --   | --        | --     | 0.15  |
| F-13                      | 61  | F      | IsCMP             | --  | --  | --                 | --   | --        | --     | 0.5   |
| F-14                      | 68  | M      | IdCMP             | --  | --  | +                  | --   | +         | --     | 0.1   |
| F-15                      | 57  | F      | IsCMP             | --  | --  | +                  | --   | +         | --     | 0.4   |
| F-16                      | 70  | M      | IdCMP             | --  | --  | +                  | +    | +         | --     | 0.5   |
| F-17                      | 66  | M      | IsCMP             | --  | --  | --                 | +    | +         | --     | 0.35  |
| F-18                      | 60  | F      | DCM               | --  | --  | --                 | --   | --        | --     | 0.1   |
| F-19                      | 32  | F      | IdCMP             | NA  | NA  | NA                 | NA   | NA        | NA     | 0.1   |
| F-20                      | 56  | F      | IsCMP             | NA  | NA  | NA                 | NA   | NA        | NA     | 0.05  |
| F-21                      | 53  | M      | DCM               | --  | --  | +                  | +    | +         | --     | 0.1   |
| F-22                      | 57  | M      | IsCMP             | --  | --  | --                 | --   | --        | --     | 0.35  |
| F-23                      | 52  | M      | IdCMP             | --  | --  | +                  | +    | --        | --     | 0.1   |
| F-24                      | 61  | M      | IdCMP             | --  | --  | --                 | --   | +         | --     | 0.1   |

MVD, mitral valve defect; VSD, ventricular septal defect; IsCMP, ischemic cardiomyopathy; DCM, dilated cardiomyopathy, IdCMP, idiopathic dilated cardiomyopathy; Dgn, digoxin, Dbt, dobutamine;  $\beta$ -Blk,  $\beta$ -adrenergic blocker, ACEI, angiotensin converting enzyme inhibitor, Ca-Blx, calcium channel blocker, NA, not available. SIRT6 levels determined by western blotting were normalized against expression of loading control (actin or tubulin) and presented as fold change over NF1.

**Table 2: Primer sequences.**

| <b>Primer Name</b>                                                               | <b>Forward Sequence (5'→ 3')</b> | <b>Reverse Sequence (5'→ 3')</b> |
|----------------------------------------------------------------------------------|----------------------------------|----------------------------------|
| <b>Primer sequences used for the ChIP assay with mouse tissues or cell lines</b> |                                  |                                  |
| mAkt1ChIP1                                                                       | ATTTCATCCTGGGCGATAGC             | CCAGAAGCCCCGACTTGATAGTAAC        |
| mAkt1ChIP2                                                                       | GTA CTGGGTGGATGAGCCCTCAATAG      | CAGCGTGGGAAGTGAATCAGTTTGAC       |
| mAkt3ChIP1                                                                       | GGAGCCATCATGAGCGATGTTAC          | TTGATTCAACAGCGCCAGAGG            |
| mAkt3ChIP2                                                                       | TGCCACAAGACCAGAGCAGTGATTTC       | CAATTGGCCTGACCGCACATAAAG         |
| mMapk3ChIP1                                                                      | CCGGGTGGGTTCCCTTAGCATTACTG       | ACCCGGCTTTCCCGCCTAGTTAC          |
| mMapk3ChIP2                                                                      | GATGGCTCAGGCCATAAG               | AGTGGCCCTCAGTAATGC               |
| mGsk3bChIP1                                                                      | TGCCAGTGCCACTCTAAC               | TGTAGTCCAGCGTCCATTG              |
| mGsk3bChIP2                                                                      | GAACAATGGACGCTGGACTACATGTG       | ATGTGGTCAGGACAGTACCTCGAATC       |
| mlgf1rChIP1                                                                      | CGTGCTCGGCTTTGACCTTC             | CGCGAGCTCCTTCCCAAATCCAG          |
| mlgf1rChIP2                                                                      | TGTAGCCGCTTGGAGTGTGC             | CCGCTCAGCGGAGTTAATG              |
| mlgf2rChIP1                                                                      | GTGGTGGTACACGCTTCTAAC            | GGTGACTGGTGGACTAATATGC           |
| mlgf2rChIP2                                                                      | GTTGTCAGGCCCTCGAGTAG             | ACGTGACGTCCTCGTTTACG             |
| mlrs2ChIP1                                                                       | TCACGCTCATTGGTCCGTCTCG           | CCGCCGCACAGTGAGTAACACATC         |
| mlrs2ChIP2                                                                       | CCCTTTCCCGGCACTATGGAAACC         | GGGCGTCATCAGAGCCATTCACTTG        |
| mTorChIP1                                                                        | CTCAGTGAACCGATTTC                | ACGGTTTGGTACCCTAAG               |
| mTorChIP2                                                                        | TCCCAGACGATCCCTAAC               | CCACGAACACTTCCGGTACG             |
| mPtenChIP1                                                                       | TGTGAGGTGCACTCTATTCACGGAGAC      | GGGTTCAATTTGCCGAAAGATGAACG       |
| mPtenChIP2                                                                       | ACGCGGGAGACACAATAGG              | GTCGGCGACAGTCTTTAC               |
| mTsc2ChIP1                                                                       | GGGCAAGGCATAGCCTAATCG            | TGGAGACCTGCCAGGAGTTC             |
| mTsc2ChIP2                                                                       | CTTGGCTCTGTTGCCAAAG              | ATCCTGCAGACCGATGATG              |
| <b>Primers used for the ChIP assay with human cell lines</b>                     |                                  |                                  |
| hAKT1ChIP-1                                                                      | TGCTGGCCTGGTGATACG               | CAGAGGGCTGGACTCAAAGAC            |
| hAKT1ChIP-2                                                                      | AGTTGTCCGAGGAACCTTCTG            | CCGGGTATGGAATGAGTAAGTG           |
| hAKT3ChIP-1                                                                      | TATTTGGGTAGGCGTGACTG             | AGCACTTCCCTAGTCTTG               |
| hAKT3ChIP-2                                                                      | CTGGCGACAGAGTGAGATTCC            | AAACCAGTCACGCCTACCC              |
| hMAPK3ChIP-1                                                                     | TGCCTTTCTTCACTCCCTACCTTC         | AGCTGAGATTGCACCACTTCAC           |
| hMAPK3ChIP-2                                                                     | TCGTAGTCCCAGCTCTTTG              | TTCCATGCCTCTCAGAGTC              |
| hGSK3bChIP-1                                                                     | CACCAATCACCGAAGGAGGTACG          | AATCAGAGTCGCCGGCCCTTACG          |
| hGSK3bChIP-2                                                                     | GCAGCTAGGTCTTGCGATTG             | GGAGGGCGTCTATAAAGCG              |
| hIGF1rChIP-1                                                                     | GGAGCGAAGACTGAGTTTG              | GGAGCCAGACTTCATTCC               |
| hIGF1rChIP-2                                                                     | GTTCCGGCTTTCCAGTACG              | GGCTGGGAGAGGTTCAATTG             |
| hIGF2rChIP-1                                                                     | CCCACGCTTGGGAAATAAC              | AGTGCCAGGGAGGTAATG               |
| hIGF2rChIP-2                                                                     | TTGACTCCACGGGCGAGTTAAAG          | CAAAGTGCCAGGGAGGTAATG            |
| hIRS2ChIP-1                                                                      | CTCGGTGCGGATGTGTTACTC            | TGCTGCTGCTGCTGGTGTG              |
| hIRS2ChIP-2                                                                      | GCGCTATGGAAACCGCACTTCTCCG        | GCGCCATTCACTTGTCAGCTTGTCG        |
| hmTORChIP-1                                                                      | TCCATAAAGAGCGCTAGCC              | CTCCCGGTGTAATTCTGAGAG            |
| hMTORChIP-2                                                                      | AAGGGAATCCTAGCAGCGCCGTACC        | AAGTTCAGGACCCGGCTTCTCCAG         |
| hPTENChIP-1                                                                      | TGCAAGGGAGCCGGATGAGGTGATAC       | CACCGCTGTCGGATCACAATCGTTCCG      |

|                                                    |                             |                          |
|----------------------------------------------------|-----------------------------|--------------------------|
| hPTENChIP-2                                        | CTGCTCAACGCACCCATCTCAGCTTTC | AGCAACGCGAGGCGAGGATAACG  |
| hTsc2ChIP-1                                        | CGAGCCTGAGATGCTTGAC         | CTGGGCAAGCTCATCTACC      |
| hTsc2ChIP-2                                        | GCCGAGGCAGGAGAATAATTTG      | TAGTGATGGGCCAGATAC       |
| <b>Primers used for the real-time PCR analysis</b> |                             |                          |
| Akt1                                               | TGGACAAGGACGGGCACATCAAG     | TACTCCGGCGTTCCGCAGAATG   |
| Akt2                                               | TGTGGGCGACTTCATCCTTTC       | TTCGGCAAGGTCATTCTGGTTCG  |
| Akt3                                               | CATAGGCTATAAGGAGAAACC       | TTGGATAGCTTCCGTCCAC      |
| Insulin1                                           | GAAGTGGAGGACCCACAAGTG       | CTGAAGGTCCCCGGGGCT       |
| Insulin2                                           | TGCTGATGCCCTGGCCTGCTCT      | CTGGTCCCACATATGCACATGCA  |
| Gsk3 $\beta$                                       | TCCATTCCCTTTGGAATCTGC       | CAATTCAGCCAACACACACAGC   |
| Irs2                                               | CGCCGCTACAGCGAAGTACT        | CGGACGCCAAGCACAAGT       |
| FoxO1                                              | TCGTACGCCGACCTCATCA         | CTGTCGCCCTTATCCTTGAAGT   |
| Pten                                               | AATCCCAGTCAGAGGCGCTATGT     | GATTGCAAGTTCGCCACTGAACA  |
| mTor                                               | GAGAACCAGCCATAAGA           | ACCAGCCAATGTAGCACT       |
| Igf1                                               | TCATGTGCTCTTACACCTCTTCT     | CCACACACGAACTGAAGAGCAT   |
| Igf2                                               | ACAACCTCGATTTGAACCACATTC    | GAGAGCTCAAACCATGCAAACCT  |
| Igf1r                                              | GTGGGGGCTCGTGTCTTCTC        | GATCACCGTGCAATTTTCCA     |
| Igf2r                                              | GGGAAGCTGTTGACTCCAAAA       | GCAGCCCATAGTGGTGTGAA     |
| Insr                                               | ATGGGCTTCGGGAGAGGAT         | GGATGTCCATACCAGGGCAC     |
| Mapk3                                              | AGGGCTACACCAAATCCATC        | GGGAACCCAAGATACCTAGAA    |
| Igfbp3                                             | GAGTGTGGAAAGCCAGGTTGTC      | GCATGGAGTGGATGGAACCTG    |
| At1                                                | GTTCTGCTCACGTGTCTCA         | CATCAGCCAGATGATGATGC     |
| At4                                                | GATGAAGGCACACCATCCAT        | AAACCAGCCTTTCTCGTTTCT    |
| GAPDH                                              | ATGGTGAAGAAGGTCCGGTGTGA     | AATCTCCACTTTGCCACTGC     |
| RPL32                                              | ACAACAGGGTGCGGAGAAGATT      | GTGACTCTGATGGCCAGCTGT    |
| 18S                                                | GGACAGGATTGACAGATTGATAG     | CTCGTTTCGTTTATCGGAATTAAC |
